# Supplementary material for: Genetic Mapping of a Light-Dependent Lesion Mimic Mutant Reveals the Function of Coproporphyrinogen III Oxidase Homolog in Soybean
Source: PubMed Central journal article supplement (PMC7227399; doi:10.3389/fpls.2020.00557), 2020-05-08
Supplement: Presentation_1.pdf [file Presentation_1.pdf]

SUPPLEMENTARY MATERIAL:

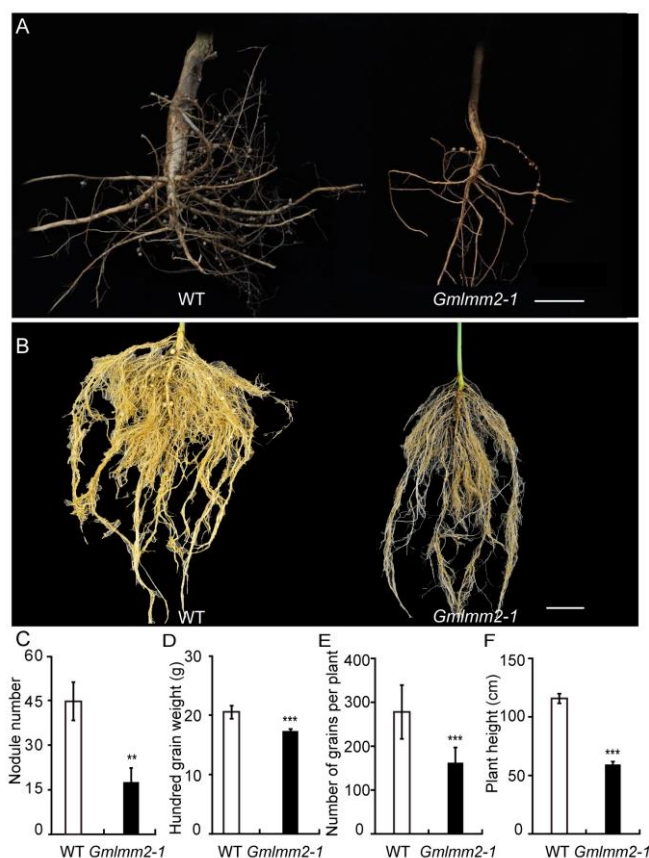

**Figure S1** Nodule phenotype and yield indices. (A) Nodule phenotype in the fields. Scale bar = 5 cm. (B) Nodule phenotype in growth chamber. Scale bar = 3 cm. (C) Nodule number in the fields. (D) Hundred grain weight in the fields. (E) Number of grains per plant in the field. (F) Plant height in the fields. The results are presented as the means  $\pm$  standard deviation, which were calculated from 10 different plants. Asterisks indicate a significant difference by student's t-test (\*\* $P < 0.01$ , \*\*\*  $p < 0.001$ ).

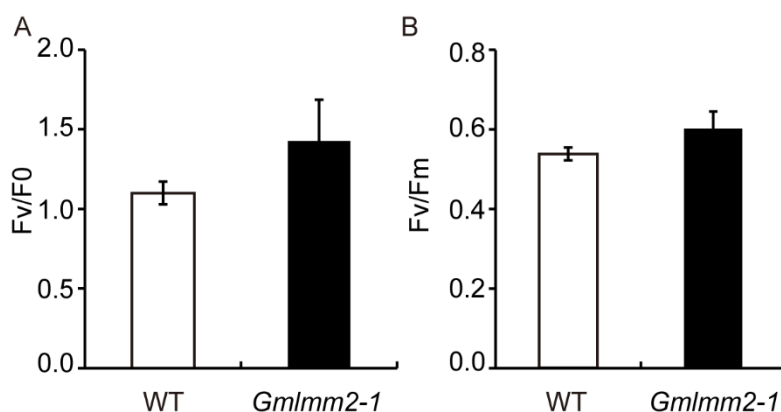

**Figure S2** Chlorophyll fluorescence parameters. Fv/F<sub>m</sub> (maximum quantum efficiency of photosystem II) and Fv/F<sub>0</sub> (maximum primary yield of photochemistry of PSII) for the 'Williams 82' and the *Gmlmm2-1* mutant. Data are from three biological replicates. The results are presented as the means  $\pm$  standard deviation.

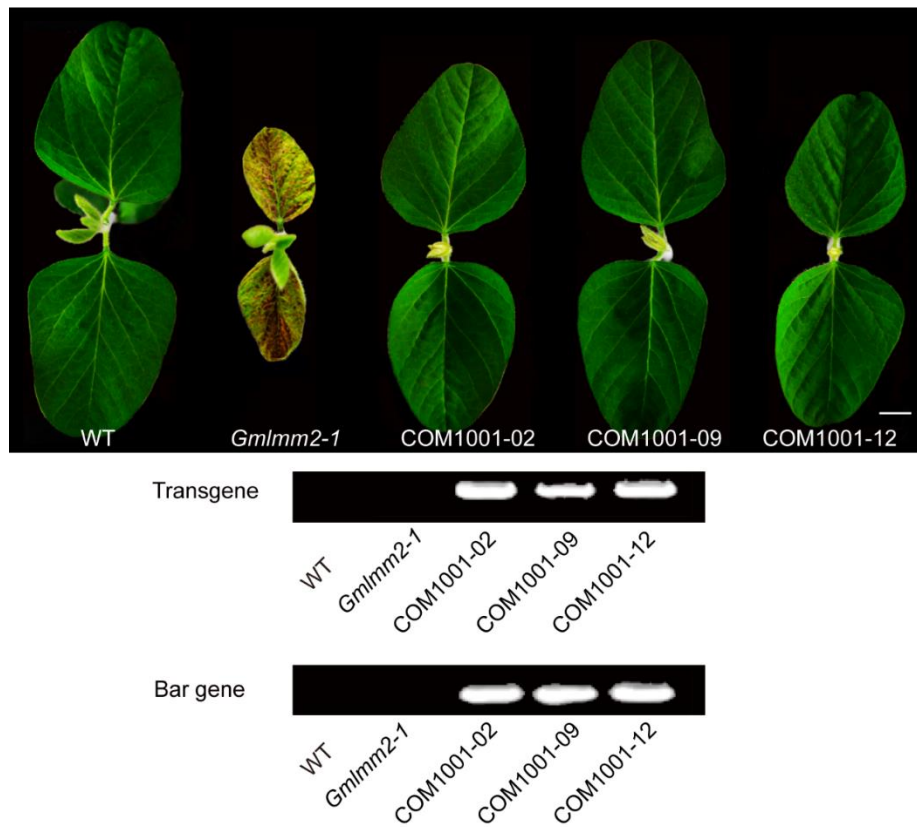

**Figure S3** The phenotype of complemented transgenic lines. Genotyping of *GmLMM2* in ‘Williams 82’ (WT), the *Gmlmm2-1* mutant, and the complemented transgenic lines (COM1001-02, COM1001-09, and COM1001-12).

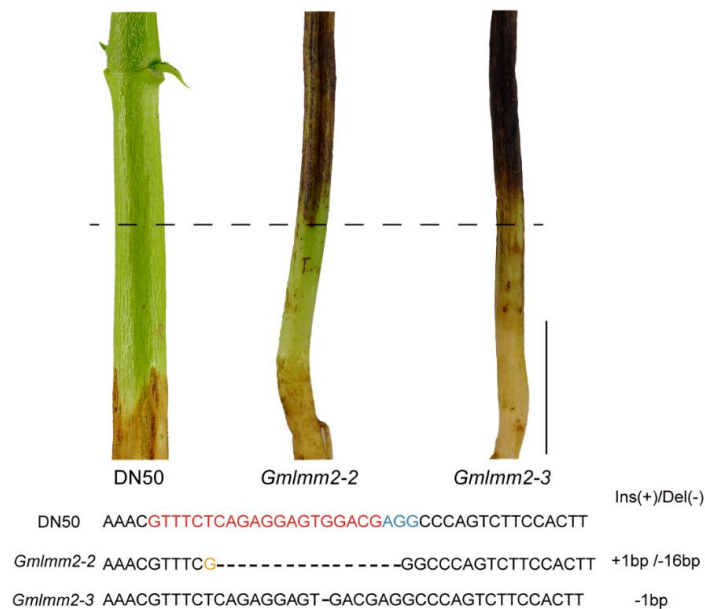

**Figure S4** The phenotype and sgRNA target sequences of the CRISPR/Cas9 lines. Scale bar = 1 cm. The sgRNA target sequence is in red and the protospacer-adjacent motif (PAM) site is in blue.

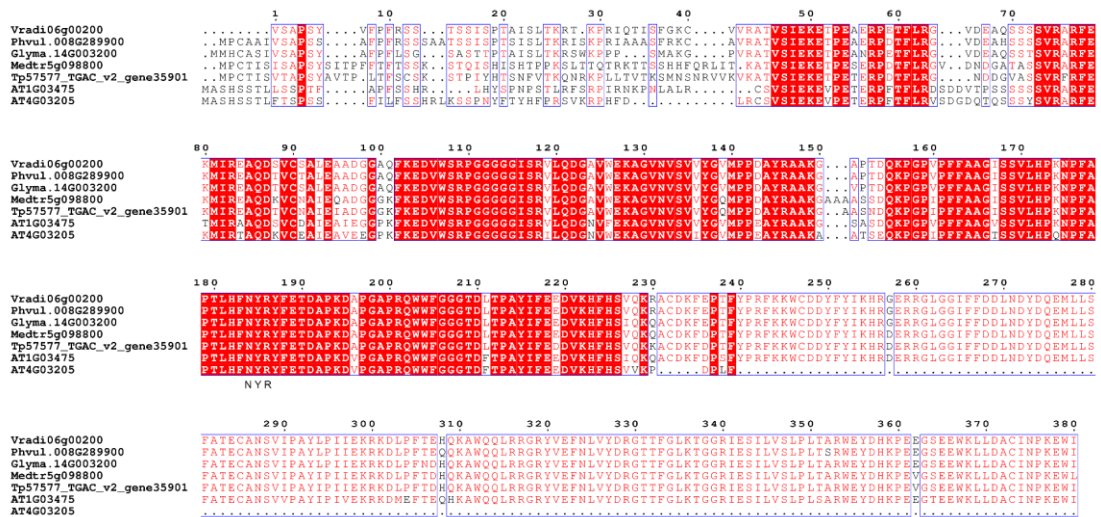

**Figure S5** Amino acid sequence alignment of GmLMM2 and its homologues. Comparison of the amino acid sequences of GmLMM2 with that of its homologues from related plant species, including *Vigna radiate* (*Vradi06g00200*), *Phaseolus vulgaris* (*Phvul.008G289900*), *Glycine max* (*Glyma.14g003200*), *Medicago truncatula* (*Medtr5g098800*), *Trifolium pretense* (*Tp57577 TGAC v2 gene35901*), and *Arabidopsis thaliana* (*AT1G03475*; *AT4G03205*) revealed a conserved tyrosine residue at the position 192. The black arrow indicates the location of the substrate-binding site.

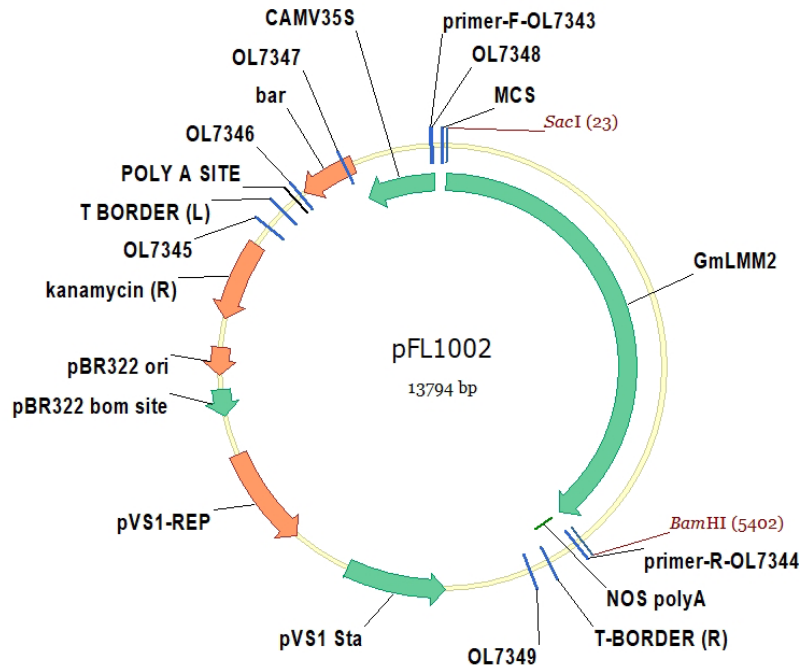

**Figure S6** Diagram of plasmid pFL1002.

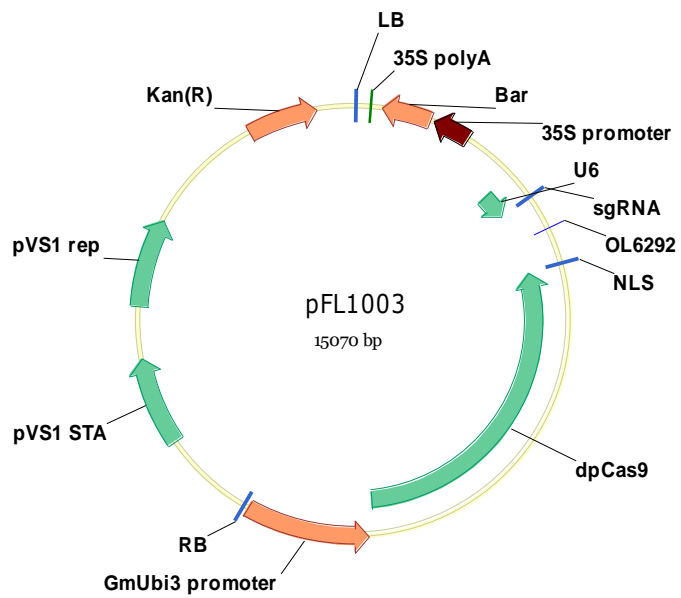

**Figure S7** Diagram of plasmid pFL1003.

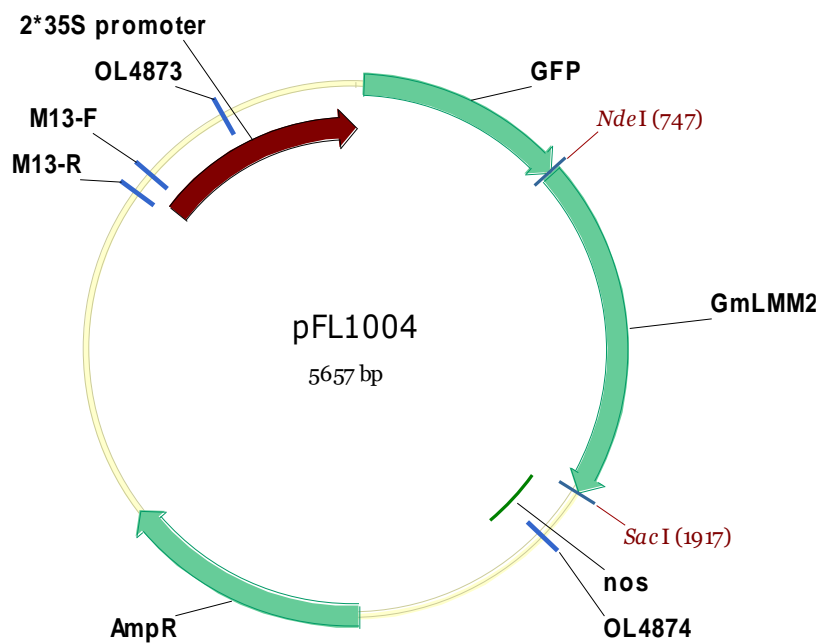

**Figure S8** Diagram of plasmid pFL1004.

**Table S1** Primers used in this study

| Primer name | Sequence (5'-3')                   | Application                 |
|-------------|------------------------------------|-----------------------------|
| MOL0507F    | GGGACGGGTGGGAATTGTAGTTGCTT         | mapping                     |
| MOL0507R    | TAGACAACCTTTTCTTGCACCCTCCC         | mapping                     |
| MOL0645F    | GAGCACAAACCATTAGGCTTCAA            | mapping                     |
| MOL0645R    | TGGGGGAGATATTGATTGATAGATG          | mapping                     |
| MOL0781F    | CAAAGGCAAGAAGGATCAAAGCA            | mapping                     |
| MOL0781R    | GAAAAATCACATCAAGCCAACCTC           | mapping                     |
| MOL3462F    | AATAGAGGGAGCGACAACAGGC             | fine mapping                |
| MOL3462R    | GAAGTCACATCAGACGTTCAAACAC          | fine mapping                |
| MOL3470F    | CTGAATGGACTTCCCAAAGGCA             | fine mapping                |
| MOL3470R    | GGAGCAAACCTAACAGAGAAACAAG          | fine mapping                |
| MOL3474F    | ACCCCTTACCACCCTATTGATAC            | mapping                     |
| MOL3474R    | GCTTGAGGCTTCTGTTCAAATTG            | mapping                     |
| MOL3552F    | TTCTATCACATCCTATAATCTATC           | fine mapping                |
| MOL3552R    | TTACAACCATCCCAAACACGCT             | fine mapping                |
| MOL3476F    | CTATCTCCATCTGCATCTGCTACG           | fine mapping                |
| MOL3476R    | AAGAGAACTGGTTAGAGAGGAAAGG          | fine mapping                |
| OL8376F     | CGCGGATCCGTCAAAGTCCTTACATTTACCTACC | pFL1002                     |
| OL8376R     | CGCGGATCCTTAGATCCATTCTTGGGGTTG     | pFL1002                     |
| OL7022F     | ATTGTTTCTCAGAGGAGTGGACG            | pFL1003                     |
| OL7022R     | AACCGTCCACTCCTCTGAGAAAC            | pFL1003                     |
| OL7674F     | GGAATTCCATATGATGATGCATTGTGCGAGC    | pFL1004                     |
| OL7674R     | CAAGAGCTCTTAGATCCATTCTTGGGGTTGAT   | pFL1004                     |
| OL7343      | GCAAGCTGCTCTAGCCAATAC              | pCAMBIA3301                 |
| OL7670F     | ATGACAGCGACCACGCTCTTGAAG           | Bar gene                    |
| OL7670R     | CTGCACCATCGTCAACCACTACATC          | Bar gene                    |
| OL1016F     | CGGTGGTTCTATCTTGGCATC              | RT-qPCR( <i>GmActin11</i> ) |
| OL1016R     | GTCTTTTCGTTCAATAACCCTA             | RT-qPCR( <i>GmActin11</i> ) |
| MOL3888F    | ATTGTCTCGGCTCCGTCCTA               | RT-qPCR( <i>GmLMM2</i> )    |
| MOL3888R    | ATAGAAACGGTGGCTCTGACTG             | RT-qPCR( <i>GmLMM2</i> )    |
| MOL3892F    | CTGCTGGTGAACCTCTTTTGCTA            | RT-qPCR( <i>GmUROD</i> )    |
| MOL3892R    | CATTTTCAGATCTTTCACGGAATG           | RT-qPCR( <i>GmUROD</i> )    |
| MOL3900F    | TGAGGAATCGGTTGAAGAGTTTG            | RT-qPCR( <i>GmPPO</i> )     |
| MOL3900R    | TTTCCCGAATGCTGCTTTCATACT           | RT-qPCR( <i>GmPPO</i> )     |
| OL9148F     | AGCCTCTCCAGCAGTTACCAAG             | RT-qPCR( <i>GmPOR</i> )     |
| OL9148R     | ATTACATGCCATTTTCCCGTCTC            | RT-qPCR( <i>GmPOR</i> )     |
| OL10014F    | CTCTCTTCTCTTGCCCAGAGACACC          | RT-qPCR( <i>GmCHLH</i> )    |
| OL10014R    | TGAGTGAAAAGACCATTGCCCATAG          | RT-qPCR( <i>GmCHLH</i> )    |
| OL10002F    | AGGTAGCACTTGCACTCCACAAACT          | RT-qPCR( <i>GmNOX</i> )     |
| OL10002R    | GCTCAGTTCAATTGCAGCTCGGATA          | RT-qPCR( <i>GmNOX</i> )     |
| OL10004F    | TCGATCAATTTGAAAGAACTTATCC          | RT-PCR( <i>GmCAT</i> )      |

|          |                           |                                 |
|----------|---------------------------|---------------------------------|
| OL10004R | GAACACATAGTCCACAACAATAGCA | RT-qPCR( <i>GmCAT</i> )         |
| OL7636F  | ACCGGTAACCTAAGTGGTACAAATG | RT-qPCR( <i>GmPRI</i> )         |
| OL7636R  | CCACATCCAAGACGCACAGAGT    | RT-qPCR( <i>GmPRI</i> )         |
| OL7640F  | AGTCTCCACTTCCGCCGTATGAT   | RT-qPCR( <i>GmCOII</i> )        |
| OL7640R  | CGTGTAACCATTCTCCGTCCCTC   | RT-qPCR( <i>GmCOII</i> )        |
| OL7642F  | GCTTCTCTCTCAGTGCATTCGTAGA | RT-qPCR( <i>GmNPR1</i> )        |
| OL7642R  | AAGGACTCCACTTCCATTGCATTAG | RT-qPCR( <i>GmNPR1</i> )        |
| OL10432F | CTCGAGCCCATCCTCGTGAAATAAT | RT-qPCR<br>( <i>GmSnRK1.1</i> ) |
| OL10432R | AACCCACCTACACTTCATGTTGTAG | RT-qPCR<br>( <i>GmSnRK1.1</i> ) |
| OL10436F | TAGCATCCACAGCATTGTTTTTC   | RT-qPCR( <i>GmPRI0</i> )        |
| OL10436R | CAAGGCAGTGCCCTCAGTTA      | RT-qPCR( <i>GmPRI0</i> )        |
| OL10440F | ACTACTCCTGAGAATAGTAGCACGG | RT-qPCR( <i>GmMYB014</i> )      |
| OL10440R | TCAGGGACACTGTAATATTCAGTCA | RT-qPCR( <i>GmMYB014</i> )      |
| OL10442F | GGCCCTTGAGAAGTAAATTAGATCC | RT-qPCR( <i>GmLOX</i> )         |
| OL10442R | CTGTGCAATAGCCAATTATTTGTGG | RT-qPCR( <i>GmLOX</i> )         |
| OL10444F | TCTTCTACGAGTCTCCGGTCTAGT  | RT-qPCR( <i>GmAOX</i> )         |
| OL10444R | AGTTAAAGCAGGTGGCGAACAACAG | RT-qPCR( <i>GmAOX</i> )         |

---

**Table S2** Genes within the candidate area

| Gene name              | Best-hit-arabi-name | arabi-defline                                           |
|------------------------|---------------------|---------------------------------------------------------|
| <i>Glyma.14G001700</i> | <i>AT4G35280</i>    | C2H2-like zinc finger protein                           |
| <i>Glyma.14G001800</i> | <i>AT4G38370</i>    | Phosphoglycerate mutase family protein                  |
| <i>Glyma.14G001900</i> | <i>AT4G35260</i>    | Isocitrate dehydrogenase 1                              |
| <i>Glyma.14G002000</i> | <i>AT4G38380</i>    | MATE efflux family protein                              |
| <i>Glyma.14G002100</i> | <i>AT1G76270</i>    | O-fucosyltransferase family protein                     |
| <i>Glyma.14G002200</i> |                     |                                                         |
| <i>Glyma.14G002300</i> | <i>AT4G35240</i>    | Protein of unknown function (DUF630 and DUF632)         |
| <i>Glyma.14G002400</i> | <i>AT4G35230</i>    | BR-signaling kinase 1                                   |
| <i>Glyma.14G002500</i> | <i>AT3G22250</i>    | UDP-Glycosyltransferase superfamily protein             |
| <i>Glyma.14G002600</i> |                     |                                                         |
| <i>Glyma.14G002700</i> | <i>AT5G60580</i>    | RING/U-box superfamily protein                          |
| <i>Glyma.14G002800</i> | <i>AT4G39720</i>    | VQ motif-containing protein                             |
| <i>Glyma.14G002900</i> | <i>AT2G32260</i>    | Phosphorylcholine cytidyltransferase                    |
| <i>Glyma.14G003000</i> | <i>AT3G22150</i>    | Tetratricopeptide repeat (TPR)-like superfamily protein |
| <i>Glyma.14G003100</i> | <i>AT1G24290</i>    | AAA-type ATPase family protein                          |
| <i>Glyma.14G003200</i> | <i>AT1G03475</i>    | Coproporphyrinogen III oxidase                          |
| <i>Glyma.14G003300</i> | <i>AT5G11340</i>    | Acyl-CoA N-acyltransferases (NAT) superfamily protein   |
| <i>Glyma.14G003400</i> | <i>AT1G61520</i>    | Photosystem I light harvesting complex gene 3           |
| <i>Glyma.14G003500</i> | <i>AT4G12650</i>    | Endomembrane protein 70 protein family                  |
| <i>Glyma.14G003600</i> | <i>AT5G48310</i>    |                                                         |
| <i>Glyma.14G003700</i> | <i>AT1G57820</i>    | Zinc finger (C3HC4-type RING finger) family protein     |
| <i>Glyma.14G003800</i> | <i>AT3G13130</i>    |                                                         |
| <i>Glyma.14G003900</i> | <i>AT5G09950</i>    | Tetratricopeptide repeat (TPR)-like superfamily protein |
| <i>Glyma.14G004000</i> | <i>AT2G05310</i>    |                                                         |
| <i>Glyma.14G004100</i> | <i>AT4G16360</i>    | 5'-AMP-activated protein kinase beta-2 subunit protein  |
| <i>Glyma.14G004200</i> | <i>AT4G12730</i>    | FASCICLIN-like arabinogalactan 2                        |
| <i>Glyma.14G004300</i> | <i>AT5G47650</i>    | Nudix hydrolase homolog 2                               |
| <i>Glyma.14G004400</i> | <i>AT3G07750</i>    | 3'-5'-exoribonuclease family protein                    |
| <i>Glyma.14G004500</i> | <i>AT3G07700</i>    | Protein kinase superfamily protein                      |
| <i>Glyma.14G004600</i> | <i>AT5G47720</i>    | Thiolase family protein                                 |
| <i>Glyma.14G004700</i> | <i>AT2G29530</i>    | Tim10/DDP family zinc finger protein                    |
| <i>Glyma.14G004800</i> | <i>AT1G31335</i>    |                                                         |

**Table S3** Syntenic genes in chromosome 14 and chromosome 2

| Gene ID                | Gene ID                |
|------------------------|------------------------|
| <i>Glyma.14G003000</i> | <i>Glyma.02G308900</i> |
| <i>Glyma.14G003100</i> | <i>Glyma.02G309000</i> |
| <i>Glyma.14G003200</i> | <i>Glyma.02G309100</i> |
| <i>Glyma.14G003300</i> | <i>Glyma.02G309200</i> |
| <i>Glyma.14G003400</i> | <i>Glyma.02G309300</i> |
| <i>Glyma.14G003500</i> | <i>Glyma.02G309400</i> |
| <i>Glyma.14G003600</i> | <i>Glyma.02G309500</i> |
| <i>Glyma.14G003700</i> | <i>Glyma.02G309600</i> |
| <i>Glyma.14G003800</i> | <i>Glyma.02G309700</i> |
| <i>Glyma.14G003900</i> |                        |
| <i>Glyma.14G004000</i> |                        |
